# Supplementary material for: Effect of Sous Vide Heat Treatment and Packaging Methods on the Microbiological Quality of Red Peppers (Capsicum annuum L.)
Source: MDPI journal article supplement (doi:10.3390/app15031303), 2025-01-27
Supplement: s1 [file s1]

Table S1. Isolated species from samples according to treatment method, packaging method and day of storage.

| ID | Type of treatment | Type of packaging | Storage day | Gram - / + | Class               | Family            | Genus          | Species                                  |
|----|-------------------|-------------------|-------------|------------|---------------------|-------------------|----------------|------------------------------------------|
| 1  | CONTROL           | ATM               | 3           | Gram -     | Gammaproteobacteria | Pseudomonadaceae  | Pseudomonas    | <i>Pseudomonas putida</i>                |
| 2  | CONTROL           | ATM               | 3           | Gram +     | Actinobacteria      | Microbacteriaceae | Microbacterium | <i>Microbacterium hydrocarbonoxydans</i> |
| 3  | CONTROL           | ATM               | 3           | Gram -     | Gammaproteobacteria | Pseudomonadaceae  | Pseudomonas    | <i>Pseudomonas fluorescens</i>           |
| 4  | CONTROL           | ATM               | 3           | Gram -     | Gammaproteobacteria | Pseudomonadaceae  | Pseudomonas    | <i>Pseudomonas rhodesiae</i>             |
| 5  | CONTROL           | ATM               | 3           | Gram -     | Gammaproteobacteria | Pseudomonadaceae  | Pseudomonas    | <i>Pseudomonas putida</i>                |
| 6  | CONTROL           | ATM               | 3           | Gram +     | Actinobacteria      | Microbacteriaceae | Microbacterium | <i>Microbacterium hydrocarbonoxydans</i> |
| 7  | CONTROL           | ATM               | 3           | Gram -     | Gammaproteobacteria | Pseudomonadaceae  | Pseudomonas    | <i>Pseudomonas fluorescens</i>           |
| 8  | CONTROL           | ATM               | 3           | Gram -     | Gammaproteobacteria | Pseudomonadaceae  | Pseudomonas    | <i>Pseudomonas rhodesiae</i>             |
| 9  | CONTROL           | ATM               | 3           | Gram -     | Gammaproteobacteria | Pseudomonadaceae  | Pseudomonas    | <i>Pseudomonas putida</i>                |
| 10 | CONTROL           | ATM               | 3           | Gram +     | Actinobacteria      | Microbacteriaceae | Microbacterium | <i>Microbacterium hydrocarbonoxydans</i> |
| 11 | CONTROL           | ATM               | 3           | Gram -     | Gammaproteobacteria | Pseudomonadaceae  | Pseudomonas    | <i>Pseudomonas fluorescens</i>           |
| 12 | CONTROL           | ATM               | 3           | Gram -     | Gammaproteobacteria | Pseudomonadaceae  | Pseudomonas    | <i>Pseudomonas rhodesiae</i>             |
| 13 | CONTROL           | ATM               | 9           | Gram -     | Gammaproteobacteria | Pseudomonadaceae  | Pseudomonas    | <i>Pseudomonas rhodesiae</i>             |
| 14 | CONTROL           | ATM               | 9           | Gram -     | Gammaproteobacteria | Pseudomonadaceae  | Pseudomonas    | <i>Pseudomonas rhodesiae</i>             |
| 15 | CONTROL           | ATM               | 9           | Gram -     | Gammaproteobacteria | Pseudomonadaceae  | Pseudomonas    | <i>Pseudomonas rhodesiae</i>             |
| 16 | CONTROL           | ATM               | 9           | Gram -     | Gammaproteobacteria | Pseudomonadaceae  | Pseudomonas    | <i>Pseudomonas veronii</i>               |
| 17 | CONTROL           | ATM               | 9           | Gram -     | Gammaproteobacteria | Pseudomonadaceae  | Pseudomonas    | <i>Pseudomonas libanensis</i>            |
| 18 | CONTROL           | ATM               | 9           | Gram -     | Gammaproteobacteria | Pseudomonadaceae  | Pseudomonas    | <i>Pseudomonas veronii</i>               |
| 19 | CONTROL           | ATM               | 9           | Gram -     | Gammaproteobacteria | Pseudomonadaceae  | Pseudomonas    | <i>Pseudomonas libanensis</i>            |
| 20 | CONTROL           | ATM               | 9           | Gram -     | Gammaproteobacteria | Pseudomonadaceae  | Pseudomonas    | <i>Pseudomonas veronii</i>               |
| 21 | CONTROL           | ATM               | 9           | Gram -     | Gammaproteobacteria | Pseudomonadaceae  | Pseudomonas    | <i>Pseudomonas libanensis</i>            |
| 22 | CONTROL           | VAC               | 3           | Gram -     | Gammaproteobacteria | Pseudomonadaceae  | Pseudomonas    | <i>Pseudomonas kilonensis</i>            |
| 23 | CONTROL           | VAC               | 3           | Gram -     | Gammaproteobacteria | Pseudomonadaceae  | Pseudomonas    | <i>Pseudomonas kilonensis</i>            |
| 24 | CONTROL           | VAC               | 3           | Gram -     | Gammaproteobacteria | Pseudomonadaceae  | Pseudomonas    | <i>Pseudomonas kilonensis</i>            |
| 25 | CONTROL           | VAC               | 9           | Gram -     | Gammaproteobacteria | Pseudomonadaceae  | Pseudomonas    | <i>Pseudomonas fragi</i>                 |
| 26 | CONTROL           | VAC               | 9           | Gram -     | Gammaproteobacteria | Pseudomonadaceae  | Pseudomonas    | <i>Pseudomonas fragi</i>                 |
| 27 | CONTROL           | VAC               | 9           | Gram -     | Gammaproteobacteria | Pseudomonadaceae  | Pseudomonas    | <i>Pseudomonas fragi</i>                 |

|    |            |     |    |        |                     |                    |                |                                   |
|----|------------|-----|----|--------|---------------------|--------------------|----------------|-----------------------------------|
| 28 | CONTROL    | MAP | 3  | Gram + | Bacilli             | Staphylococcaceae  | Staphylococcus | <i>Staphylococcus xylosus</i>     |
| 29 | CONTROL    | MAP | 3  | Gram + | Bacilli             | Staphylococcaceae  | Staphylococcus | <i>Staphylococcus succinus</i>    |
| 30 | CONTROL    | MAP | 3  | Gram + | Bacilli             | Staphylococcaceae  | Staphylococcus | <i>Staphylococcus xylosus</i>     |
| 31 | CONTROL    | MAP | 3  | Gram + | Bacilli             | Staphylococcaceae  | Staphylococcus | <i>Staphylococcus succinus</i>    |
| 32 | CONTROL    | MAP | 3  | Gram + | Bacilli             | Staphylococcaceae  | Staphylococcus | <i>Staphylococcus xylosus</i>     |
| 33 | CONTROL    | MAP | 3  | Gram + | Bacilli             | Staphylococcaceae  | Staphylococcus | <i>Staphylococcus succinus</i>    |
| 34 | CONTROL    | MAP | 6  | Gram - | Gammaproteobacteria | Pseudomonadaceae   | Pseudomonas    | <i>Pseudomonas brassicacearum</i> |
| 35 | CONTROL    | MAP | 6  | Gram - | Gammaproteobacteria | Pseudomonadaceae   | Pseudomonas    | <i>Pseudomonas brassicacearum</i> |
| 36 | CONTROL    | MAP | 6  | Gram - | Gammaproteobacteria | Pseudomonadaceae   | Pseudomonas    | <i>Pseudomonas brassicacearum</i> |
| 37 | CONTROL    | MAP | 9  | Gram - | Gammaproteobacteria | Enterobacteriaceae | Buttiauxella   | <i>Buttiauxella gaviniae</i>      |
| 38 | CONTROL    | MAP | 9  | Gram - | Gammaproteobacteria | Enterobacteriaceae | Buttiauxella   | <i>Buttiauxella gaviniae</i>      |
| 39 | CONTROL    | MAP | 9  | Gram - | Gammaproteobacteria | Enterobacteriaceae | Buttiauxella   | <i>Buttiauxella gaviniae</i>      |
| 40 | 30min/60°C | ATM | 15 | Gram - | Gammaproteobacteria | Pseudomonadaceae   | Pseudomonas    | <i>Pseudomonas taetrolens</i>     |
| 41 | 30min/60°C | ATM | 15 | Gram - | Gammaproteobacteria | Pseudomonadaceae   | Pseudomonas    | <i>Pseudomonas taetrolens</i>     |
| 42 | 30min/60°C | ATM | 15 | Gram - | Gammaproteobacteria | Pseudomonadaceae   | Pseudomonas    | <i>Pseudomonas taetrolens</i>     |
| 43 | 30min/60°C | ATM | 24 | Gram - | Gammaproteobacteria | Pseudomonadaceae   | Pseudomonas    | <i>Pseudomonas synxantha</i>      |
| 44 | 30min/60°C | ATM | 24 | Gram - | Gammaproteobacteria | Pseudomonadaceae   | Pseudomonas    | <i>Pseudomonas taetrolens</i>     |
| 45 | 30min/60°C | ATM | 24 | Gram - | Gammaproteobacteria | Pseudomonadaceae   | Pseudomonas    | <i>Pseudomonas rhodesiae</i>      |
| 46 | 30min/60°C | ATM | 24 | Gram - | Gammaproteobacteria | Pseudomonadaceae   | Pseudomonas    | <i>Pseudomonas synxantha</i>      |
| 47 | 30min/60°C | ATM | 24 | Gram - | Gammaproteobacteria | Pseudomonadaceae   | Pseudomonas    | <i>Pseudomonas taetrolens</i>     |
| 48 | 30min/60°C | ATM | 24 | Gram - | Gammaproteobacteria | Pseudomonadaceae   | Pseudomonas    | <i>Pseudomonas rhodesiae</i>      |
| 49 | 30min/60°C | ATM | 24 | Gram - | Gammaproteobacteria | Pseudomonadaceae   | Pseudomonas    | <i>Pseudomonas synxantha</i>      |
| 50 | 30min/60°C | ATM | 24 | Gram - | Gammaproteobacteria | Pseudomonadaceae   | Pseudomonas    | <i>Pseudomonas taetrolens</i>     |
| 51 | 30min/60°C | ATM | 24 | Gram - | Gammaproteobacteria | Pseudomonadaceae   | Pseudomonas    | <i>Pseudomonas rhodesiae</i>      |
| 52 | 30min/60°C | MAP | 18 | Gram - | Gammaproteobacteria | Yersiniaceae       | Serratia       | <i>Serratia marcescens</i>        |
| 53 | 30min/60°C | MAP | 18 | Gram - | Gammaproteobacteria | Yersiniaceae       | Serratia       | <i>Serratia marcescens</i>        |
| 54 | 30min/60°C | MAP | 18 | Gram + | Actinobacteria      | Microbacteriaceae  | Microbacterium | <i>Microbacterium oxydans</i>     |
| 55 | 30min/60°C | MAP | 18 | Gram - | Gammaproteobacteria | Yersiniaceae       | Serratia       | <i>Serratia marcescens</i>        |
| 56 | 30min/60°C | MAP | 18 | Gram - | Gammaproteobacteria | Yersiniaceae       | Serratia       | <i>Serratia marcescens</i>        |
| 57 | 30min/60°C | MAP | 18 | Gram + | Actinobacteria      | Microbacteriaceae  | Microbacterium | <i>Microbacterium oxydans</i>     |

|    |            |     |    |        |                     |                   |                |                                    |
|----|------------|-----|----|--------|---------------------|-------------------|----------------|------------------------------------|
| 58 | 30min/60°C | MAP | 18 | Gram - | Gammaproteobacteria | Yersiniaceae      | Serratia       | <i>Serratia marcescens</i>         |
| 59 | 30min/60°C | MAP | 18 | Gram - | Gammaproteobacteria | Yersiniaceae      | Serratia       | <i>Serratia marcescens</i>         |
| 60 | 30min/60°C | MAP | 18 | Gram + | Actinobacteria      | Microbacteriaceae | Microbacterium | <i>Microbacterium oxydans</i>      |
| 61 | 15min/70°C | ATM | 6  | Gram + | Bacilli             | Staphylococcaceae | Staphylococcus | <i>Staphylococcus warneri</i>      |
| 62 | 15min/70°C | ATM | 6  | Gram + | Bacilli             | Staphylococcaceae | Staphylococcus | <i>Staphylococcus warneri</i>      |
| 63 | 15min/70°C | ATM | 6  | Gram + | Bacilli             | Staphylococcaceae | Staphylococcus | <i>Staphylococcus warneri</i>      |
| 64 | 15min/70°C | ATM | 12 | Gram - | Gammaproteobacteria | Erwiniaceae       | Pantoea        | <i>Pantoea agglomerans</i>         |
| 65 | 15min/70°C | ATM | 12 | Gram - | Gammaproteobacteria | Erwiniaceae       | Pantoea        | <i>Pantoea agglomerans</i>         |
| 66 | 15min/70°C | ATM | 12 | Gram - | Gammaproteobacteria | Erwiniaceae       | Pantoea        | <i>Pantoea agglomerans</i>         |
| 67 | 15min/70°C | ATM | 12 | Gram + | Actinobacteria      | Microbacteriaceae | Microbacterium | <i>Microbacterium oxydans</i>      |
| 68 | 15min/70°C | ATM | 12 | Gram - | Gammaproteobacteria | Erwiniaceae       | Pantoea        | <i>Pantoea agglomerans</i>         |
| 69 | 15min/70°C | ATM | 12 | Gram - | Gammaproteobacteria | Erwiniaceae       | Pantoea        | <i>Pantoea agglomerans</i>         |
| 70 | 15min/70°C | ATM | 12 | Gram - | Gammaproteobacteria | Erwiniaceae       | Pantoea        | <i>Pantoea agglomerans</i>         |
| 71 | 15min/70°C | ATM | 12 | Gram + | Actinobacteria      | Microbacteriaceae | Microbacterium | <i>Microbacterium oxydans</i>      |
| 72 | 15min/70°C | ATM | 12 | Gram - | Gammaproteobacteria | Erwiniaceae       | Pantoea        | <i>Pantoea agglomerans</i>         |
| 73 | 15min/70°C | ATM | 12 | Gram - | Gammaproteobacteria | Erwiniaceae       | Pantoea        | <i>Pantoea agglomerans</i>         |
| 74 | 15min/70°C | ATM | 12 | Gram - | Gammaproteobacteria | Erwiniaceae       | Pantoea        | <i>Pantoea agglomerans</i>         |
| 75 | 15min/70°C | ATM | 12 | Gram + | Actinobacteria      | Microbacteriaceae | Microbacterium | <i>Microbacterium oxydans</i>      |
| 76 | 15min/70°C | MAP | 1  | Gram + | Bacilli             | Staphylococcaceae | Staphylococcus | <i>Staphylococcus warneri</i>      |
| 77 | 15min/70°C | MAP | 1  | Gram - | Gammaproteobacteria | Yersiniaceae      | Serratia       | <i>Serratia marcescens</i>         |
| 78 | 15min/70°C | MAP | 1  | Gram + | Bacilli             | Staphylococcaceae | Staphylococcus | <i>Staphylococcus pasteurii</i>    |
| 79 | 15min/70°C | MAP | 1  | Gram + | Bacilli             | Staphylococcaceae | Staphylococcus | <i>Staphylococcus warneri</i>      |
| 80 | 15min/70°C | MAP | 1  | Gram - | Gammaproteobacteria | Yersiniaceae      | Serratia       | <i>Serratia marcescens</i>         |
| 81 | 15min/70°C | MAP | 1  | Gram + | Bacilli             | Staphylococcaceae | Staphylococcus | <i>Staphylococcus pasteurii</i>    |
| 82 | 15min/70°C | MAP | 1  | Gram + | Bacilli             | Staphylococcaceae | Staphylococcus | <i>Staphylococcus warneri</i>      |
| 83 | 15min/70°C | MAP | 1  | Gram - | Gammaproteobacteria | Yersiniaceae      | Serratia       | <i>Serratia marcescens</i>         |
| 84 | 15min/70°C | MAP | 1  | Gram + | Bacilli             | Staphylococcaceae | Staphylococcus | <i>Staphylococcus pasteurii</i>    |
| 85 | 15min/70°C | MAP | 3  | Gram + | Bacilli             | Staphylococcaceae | Staphylococcus | <i>Staphylococcus warneri</i>      |
| 86 | 15min/70°C | MAP | 3  | Gram + | Bacilli             | Staphylococcaceae | Staphylococcus | <i>Staphylococcus pasteurii</i>    |
| 87 | 15min/70°C | MAP | 3  | Gram + | Bacilli             | Staphylococcaceae | Staphylococcus | <i>Staphylococcus haemolyticus</i> |

|     |            |     |    |        |                     |                   |                |                                    |
|-----|------------|-----|----|--------|---------------------|-------------------|----------------|------------------------------------|
| 88  | 15min/70°C | MAP | 3  | Gram + | Bacilli             | Staphylococcaceae | Staphylococcus | <i>Staphylococcus warneri</i>      |
| 89  | 15min/70°C | MAP | 3  | Gram + | Bacilli             | Staphylococcaceae | Staphylococcus | <i>Staphylococcus pasteurii</i>    |
| 90  | 15min/70°C | MAP | 3  | Gram + | Bacilli             | Staphylococcaceae | Staphylococcus | <i>Staphylococcus haemolyticus</i> |
| 91  | 15min/70°C | MAP | 3  | Gram + | Bacilli             | Staphylococcaceae | Staphylococcus | <i>Staphylococcus warneri</i>      |
| 92  | 15min/70°C | MAP | 3  | Gram + | Bacilli             | Staphylococcaceae | Staphylococcus | <i>Staphylococcus pasteurii</i>    |
| 93  | 15min/70°C | MAP | 3  | Gram + | Bacilli             | Staphylococcaceae | Staphylococcus | <i>Staphylococcus haemolyticus</i> |
| 94  | 15min/70°C | MAP | 12 | Gram - | Gammaproteobacteria | Yersiniaceae      | Rahnella       | <i>Rahnella aquatilis</i>          |
| 95  | 15min/70°C | MAP | 12 | Gram - | Gammaproteobacteria | Yersiniaceae      | Serratia       | <i>Serratia liquefaciens</i>       |
| 96  | 15min/70°C | MAP | 12 | Gram - | Gammaproteobacteria | Yersiniaceae      | Serratia       | <i>Serratia liquefaciens</i>       |
| 97  | 15min/70°C | MAP | 12 | Gram - | Gammaproteobacteria | Yersiniaceae      | Serratia       | <i>Serratia liquefaciens</i>       |
| 98  | 15min/70°C | MAP | 12 | Gram - | Gammaproteobacteria | Yersiniaceae      | Rahnella       | <i>Rahnella aquatilis</i>          |
| 99  | 15min/70°C | MAP | 12 | Gram - | Gammaproteobacteria | Yersiniaceae      | Serratia       | <i>Serratia liquefaciens</i>       |
| 100 | 15min/70°C | MAP | 12 | Gram - | Gammaproteobacteria | Yersiniaceae      | Serratia       | <i>Serratia liquefaciens</i>       |
| 101 | 15min/70°C | MAP | 12 | Gram - | Gammaproteobacteria | Yersiniaceae      | Serratia       | <i>Serratia liquefaciens</i>       |
| 102 | 15min/70°C | MAP | 12 | Gram - | Gammaproteobacteria | Yersiniaceae      | Rahnella       | <i>Rahnella aquatilis</i>          |
| 103 | 15min/70°C | MAP | 12 | Gram - | Gammaproteobacteria | Yersiniaceae      | Serratia       | <i>Serratia liquefaciens</i>       |
| 104 | 15min/70°C | MAP | 12 | Gram - | Gammaproteobacteria | Yersiniaceae      | Serratia       | <i>Serratia liquefaciens</i>       |
| 105 | 15min/70°C | MAP | 12 | Gram - | Gammaproteobacteria | Yersiniaceae      | Serratia       | <i>Serratia liquefaciens</i>       |
| 106 | 15min/70°C | MAP | 15 | Gram - | Gammaproteobacteria | Erwiniaceae       | Pantoea        | <i>Pantoea agglomerans</i>         |
| 107 | 15min/70°C | MAP | 15 | Gram - | Gammaproteobacteria | Erwiniaceae       | Pantoea        | <i>Pantoea agglomerans</i>         |
| 108 | 15min/70°C | MAP | 15 | Gram - | Gammaproteobacteria | Erwiniaceae       | Pantoea        | <i>Pantoea agglomerans</i>         |
| 109 | 15min/70°C | MAP | 15 | Gram - | Gammaproteobacteria | Erwiniaceae       | Pantoea        | <i>Pantoea agglomerans</i>         |
| 110 | 15min/70°C | MAP | 15 | Gram - | Gammaproteobacteria | Erwiniaceae       | Pantoea        | <i>Pantoea agglomerans</i>         |
| 111 | 15min/70°C | MAP | 15 | Gram - | Gammaproteobacteria | Erwiniaceae       | Pantoea        | <i>Pantoea agglomerans</i>         |
| 112 | 15min/70°C | MAP | 15 | Gram - | Gammaproteobacteria | Erwiniaceae       | Pantoea        | <i>Pantoea agglomerans</i>         |
| 113 | 15min/70°C | MAP | 15 | Gram - | Gammaproteobacteria | Erwiniaceae       | Pantoea        | <i>Pantoea agglomerans</i>         |
| 114 | 15min/70°C | MAP | 15 | Gram - | Gammaproteobacteria | Erwiniaceae       | Pantoea        | <i>Pantoea agglomerans</i>         |
| 115 | 15min/70°C | MAP | 18 | Gram + | Actinobacteria      | Micrococcaceae    | Kocuria        | <i>Kocuria palustris</i>           |
| 116 | 15min/70°C | MAP | 18 | Gram + | Actinobacteria      | Micrococcaceae    | Kocuria        | <i>Kocuria palustris</i>           |
| 117 | 15min/70°C | MAP | 18 | Gram + | Actinobacteria      | Micrococcaceae    | Kocuria        | <i>Kocuria palustris</i>           |

|     |            |     |    |        |                     |                    |                     |                                    |
|-----|------------|-----|----|--------|---------------------|--------------------|---------------------|------------------------------------|
| 118 | 15min/70°C | MAP | 21 | Gram - | Gammaproteobacteria | Enterobacteriaceae | Enterobacter        | <i>Enterobacter cloacae</i>        |
| 119 | 15min/70°C | MAP | 21 | Gram - | Gammaproteobacteria | Pseudomonadaceae   | Pseudomonas         | <i>Pseudomonas rhodesiae</i>       |
| 120 | 15min/70°C | MAP | 21 | Gram - | Gammaproteobacteria | Pseudomonadaceae   | Pseudomonas         | <i>Pseudomonas rhodesiae</i>       |
| 121 | 15min/70°C | MAP | 21 | Gram - | Gammaproteobacteria | Pseudomonadaceae   | Pseudomonas         | <i>Pseudomonas rhodesiae</i>       |
| 122 | 15min/70°C | MAP | 21 | Gram - | Gammaproteobacteria | Enterobacteriaceae | Enterobacter        | <i>Enterobacter cloacae</i>        |
| 123 | 15min/70°C | MAP | 21 | Gram - | Gammaproteobacteria | Pseudomonadaceae   | Pseudomonas         | <i>Pseudomonas rhodesiae</i>       |
| 124 | 15min/70°C | MAP | 21 | Gram - | Gammaproteobacteria | Pseudomonadaceae   | Pseudomonas         | <i>Pseudomonas rhodesiae</i>       |
| 125 | 15min/70°C | MAP | 21 | Gram - | Gammaproteobacteria | Pseudomonadaceae   | Pseudomonas         | <i>Pseudomonas rhodesiae</i>       |
| 126 | 15min/70°C | MAP | 21 | Gram - | Gammaproteobacteria | Enterobacteriaceae | Enterobacter        | <i>Enterobacter cloacae</i>        |
| 127 | 15min/70°C | MAP | 21 | Gram - | Gammaproteobacteria | Pseudomonadaceae   | Pseudomonas         | <i>Pseudomonas rhodesiae</i>       |
| 128 | 15min/70°C | MAP | 21 | Gram - | Gammaproteobacteria | Pseudomonadaceae   | Pseudomonas         | <i>Pseudomonas rhodesiae</i>       |
| 129 | 15min/70°C | MAP | 21 | Gram - | Gammaproteobacteria | Pseudomonadaceae   | Pseudomonas         | <i>Pseudomonas rhodesiae</i>       |
| 130 | 8min/80°C  | ATM | 1  | Gram + | Bacilli             | Staphylococcaceae  | Staphylococcus      | <i>Staphylococcus haemolyticus</i> |
| 131 | 8min/80°C  | ATM | 1  | Gram + | Bacilli             | Staphylococcaceae  | Staphylococcus      | <i>Staphylococcus haemolyticus</i> |
| 132 | 8min/80°C  | ATM | 1  | Gram + | Bacilli             | Staphylococcaceae  | Staphylococcus      | <i>Staphylococcus haemolyticus</i> |
| 133 | 8min/80°C  | ATM | 24 | Gram - | Gammaproteobacteria | Pseudomonadaceae   | Pseudomonas         | <i>Pseudomonas synxantha</i>       |
| 134 | 8min/80°C  | ATM | 24 | Gram - | Gammaproteobacteria | Pseudomonadaceae   | Pseudomonas         | <i>Pseudomonas synxantha</i>       |
| 135 | 8min/80°C  | ATM | 24 | Gram - | Gammaproteobacteria | Pseudomonadaceae   | Pseudomonas         | <i>Pseudomonas synxantha</i>       |
| 136 | 8min/80°C  | VAC | 21 | Gram + | Bacilli             | Lactobacillaceae   | Lactiplantibacillus | <i>Lactobacillus plantarum</i>     |
| 137 | 8min/80°C  | VAC | 21 | Gram + | Bacilli             | Lactobacillaceae   | Lactiplantibacillus | <i>Lactobacillus plantarum</i>     |
| 138 | 8min/80°C  | VAC | 21 | Gram + | Bacilli             | Lactobacillaceae   | Lactiplantibacillus | <i>Lactobacillus plantarum</i>     |
| 139 | 8min/80°C  | MAP | 6  | Gram - | Alphaproteobacteria | Brucellaceae       | Ochrobactrum        | <i>Ochrobactrum anthropi</i>       |
| 140 | 8min/80°C  | MAP | 6  | Gram - | Gammaproteobacteria | Pseudomonadaceae   | Pseudomonas         | <i>Pseudomonas lundensis</i>       |
| 141 | 8min/80°C  | MAP | 6  | Gram - | Alphaproteobacteria | Brucellaceae       | Ochrobactrum        | <i>Ochrobactrum anthropi</i>       |
| 142 | 8min/80°C  | MAP | 6  | Gram - | Gammaproteobacteria | Pseudomonadaceae   | Pseudomonas         | <i>Pseudomonas lundensis</i>       |
| 143 | 8min/80°C  | MAP | 6  | Gram - | Alphaproteobacteria | Brucellaceae       | Ochrobactrum        | <i>Ochrobactrum anthropi</i>       |
| 144 | 8min/80°C  | MAP | 6  | Gram - | Gammaproteobacteria | Pseudomonadaceae   | Pseudomonas         | <i>Pseudomonas lundensis</i>       |
| 145 | 8min/80°C  | MAP | 12 | Gram - | Gammaproteobacteria | Pseudomonadaceae   | Pseudomonas         | <i>Pseudomonas taetrolens</i>      |
| 146 | 8min/80°C  | MAP | 12 | Gram - | Gammaproteobacteria | Pseudomonadaceae   | Pseudomonas         | <i>Pseudomonas taetrolens</i>      |
| 147 | 8min/80°C  | MAP | 12 | Gram + | Actinobacteria      | Microbacteriaceae  | Microbacterium      | <i>Microbacterium paraoxydans</i>  |

|     |           |     |    |        |                     |                   |                |                                   |
|-----|-----------|-----|----|--------|---------------------|-------------------|----------------|-----------------------------------|
| 148 | 8min/80°C | MAP | 12 | Gram - | Gammaproteobacteria | Pseudomonadaceae  | Pseudomonas    | <i>Pseudomonas taetrolens</i>     |
| 149 | 8min/80°C | MAP | 12 | Gram - | Gammaproteobacteria | Pseudomonadaceae  | Pseudomonas    | <i>Pseudomonas taetrolens</i>     |
| 150 | 8min/80°C | MAP | 12 | Gram + | Actinobacteria      | Microbacteriaceae | Microbacterium | <i>Microbacterium paraoxydans</i> |
| 151 | 8min/80°C | MAP | 12 | Gram - | Gammaproteobacteria | Pseudomonadaceae  | Pseudomonas    | <i>Pseudomonas taetrolens</i>     |
| 152 | 8min/80°C | MAP | 12 | Gram - | Gammaproteobacteria | Pseudomonadaceae  | Pseudomonas    | <i>Pseudomonas taetrolens</i>     |
| 153 | 8min/80°C | MAP | 12 | Gram + | Actinobacteria      | Microbacteriaceae | Microbacterium | <i>Microbacterium paraoxydans</i> |
| 154 | 8min/80°C | MAP | 15 | Gram - | Gammaproteobacteria | Yersiniaceae      | Serratia       | <i>Serratia liquefaciens</i>      |
| 155 | 8min/80°C | MAP | 15 | Gram - | Gammaproteobacteria | Yersiniaceae      | Serratia       | <i>Serratia liquefaciens</i>      |
| 156 | 8min/80°C | MAP | 15 | Gram - | Gammaproteobacteria | Yersiniaceae      | Serratia       | <i>Serratia liquefaciens</i>      |
| 157 | 8min/80°C | MAP | 15 | Gram - | Gammaproteobacteria | Yersiniaceae      | Rahnella       | <i>Rahnella aquatilis</i>         |
| 158 | 8min/80°C | MAP | 15 | Gram - | Gammaproteobacteria | Yersiniaceae      | Serratia       | <i>Serratia liquefaciens</i>      |
| 159 | 8min/80°C | MAP | 15 | Gram - | Gammaproteobacteria | Pseudomonadaceae  | Pseudomonas    | <i>Pseudomonas rhodesiae</i>      |
| 160 | 8min/80°C | MAP | 15 | Gram - | Gammaproteobacteria | Yersiniaceae      | Serratia       | <i>Serratia liquefaciens</i>      |
| 161 | 8min/80°C | MAP | 15 | Gram - | Gammaproteobacteria | Yersiniaceae      | Serratia       | <i>Serratia liquefaciens</i>      |
| 162 | 8min/80°C | MAP | 15 | Gram - | Gammaproteobacteria | Yersiniaceae      | Serratia       | <i>Serratia liquefaciens</i>      |
| 163 | 8min/80°C | MAP | 15 | Gram - | Gammaproteobacteria | Yersiniaceae      | Rahnella       | <i>Rahnella aquatilis</i>         |
| 164 | 8min/80°C | MAP | 15 | Gram - | Gammaproteobacteria | Yersiniaceae      | Serratia       | <i>Serratia liquefaciens</i>      |
| 165 | 8min/80°C | MAP | 15 | Gram - | Gammaproteobacteria | Pseudomonadaceae  | Pseudomonas    | <i>Pseudomonas rhodesiae</i>      |
| 166 | 8min/80°C | MAP | 15 | Gram - | Gammaproteobacteria | Yersiniaceae      | Serratia       | <i>Serratia liquefaciens</i>      |
| 167 | 8min/80°C | MAP | 15 | Gram - | Gammaproteobacteria | Yersiniaceae      | Serratia       | <i>Serratia liquefaciens</i>      |
| 168 | 8min/80°C | MAP | 15 | Gram - | Gammaproteobacteria | Yersiniaceae      | Serratia       | <i>Serratia liquefaciens</i>      |
| 169 | 8min/80°C | MAP | 15 | Gram - | Gammaproteobacteria | Yersiniaceae      | Rahnella       | <i>Rahnella aquatilis</i>         |
| 170 | 8min/80°C | MAP | 15 | Gram - | Gammaproteobacteria | Yersiniaceae      | Serratia       | <i>Serratia liquefaciens</i>      |
| 171 | 8min/80°C | MAP | 15 | Gram - | Gammaproteobacteria | Pseudomonadaceae  | Pseudomonas    | <i>Pseudomonas rhodesiae</i>      |
| 172 | 8min/80°C | MAP | 18 | Gram - | Gammaproteobacteria | Pseudomonadaceae  | Pseudomonas    | <i>Pseudomonas rhodesiae</i>      |
| 173 | 8min/80°C | MAP | 18 | Gram - | Gammaproteobacteria | Pseudomonadaceae  | Pseudomonas    | <i>Pseudomonas rhodesiae</i>      |
| 174 | 8min/80°C | MAP | 18 | Gram - | Gammaproteobacteria | Pseudomonadaceae  | Pseudomonas    | <i>Pseudomonas rhodesiae</i>      |
| 175 | 8min/80°C | MAP | 21 | Gram - | Gammaproteobacteria | Yersiniaceae      | Serratia       | <i>Serratia liquefaciens</i>      |
| 176 | 8min/80°C | MAP | 21 | Gram - | Gammaproteobacteria | Yersiniaceae      | Serratia       | <i>Serratia liquefaciens</i>      |
| 177 | 8min/80°C | MAP | 21 | Gram - | Gammaproteobacteria | Yersiniaceae      | Serratia       | <i>Serratia liquefaciens</i>      |

|     |           |     |    |        |                     |              |          |                              |
|-----|-----------|-----|----|--------|---------------------|--------------|----------|------------------------------|
| 178 | 8min/80°C | MAP | 21 | Gram - | Gammaproteobacteria | Yersiniaceae | Serratia | <i>Serratia liquefaciens</i> |
| 179 | 8min/80°C | MAP | 21 | Gram - | Gammaproteobacteria | Yersiniaceae | Serratia | <i>Serratia liquefaciens</i> |
| 180 | 8min/80°C | MAP | 21 | Gram - | Gammaproteobacteria | Yersiniaceae | Serratia | <i>Serratia liquefaciens</i> |
